# Supplementary material for: A dual supramolecular crosslinked polyurethane with superior mechanical properties and autonomous self-healing ability
Source: Royal Society of Chemistry journal article supplement (doi:10.1039/c9nj05446d), 2020-01-01
Supplement: c9nj05446d1.pdf [file c9nj05446d1.pdf]

## A Dual Supramolecular Crosslinked Polyurethane With Superior Mechanical Properties and Autonomous Self-Healing Ability

Shaobin Xu<sup>a,b</sup>, Dekun Sheng<sup>a</sup>, Yan Zhou<sup>a</sup>, Haohao Wu<sup>a,b</sup>, Haopu Xie<sup>a,b</sup>, Xinxin Tian<sup>a,b</sup>, Yinglu Sun<sup>a,b</sup>,

Xiangdong Liu<sup>\*a</sup> and Yuming Yang<sup>\*a,b</sup>

<sup>a</sup> CAS Key Laboratory of High-Performance Synthetic Rubber and its Composite Materials, Changchun Institute of Applied Chemistry, Chinese Academy of Sciences, Changchun, 130022, P. R. China.

<sup>b</sup> University of Science and Technology of China, Hefei, 230026, P. R. China

\*Corresponding authors. E-mail: liuxiangdong@ciac.ac.cn(X Liu), ymyang@ciac.ac.cn(Y. Yang).

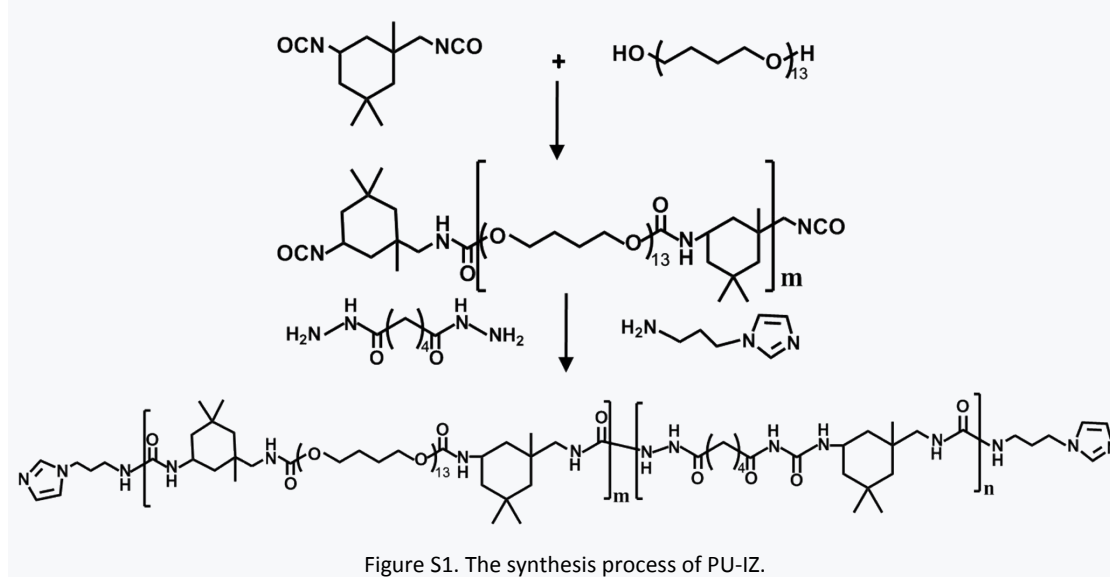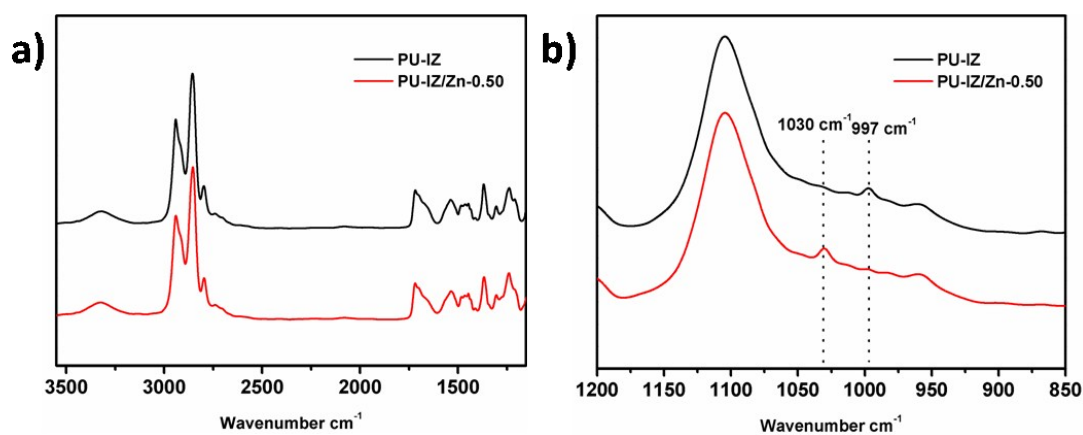

Figure S2. FTIR of the PU-IZ and PU-IZ/Zn-0.50

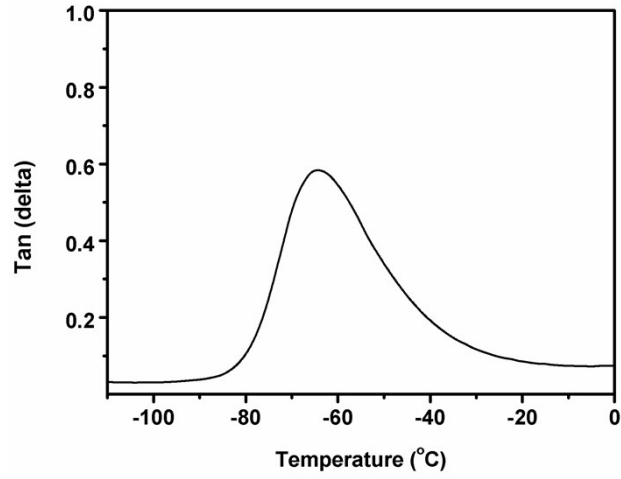

Figure S3. Temperature dependence of Tan (delta) for PU-IZ/Zn-0.50.

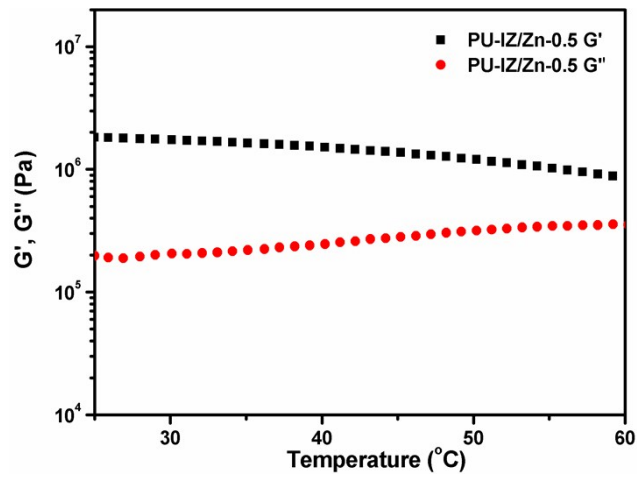

Figure S4. Temperature dependency of storage shear modulus and loss shear modulus for PU-IZ/Zn-0.50.
